# Supplementary material
Source: HighWire-hosted journal article supplement (https://molpharm.aspetjournals.org/highwire/filestream/76786/field_highwire_adjunct_files/13/SupplementrayFig1.pdf)

# Supplementary Figure S1

## PSMA3

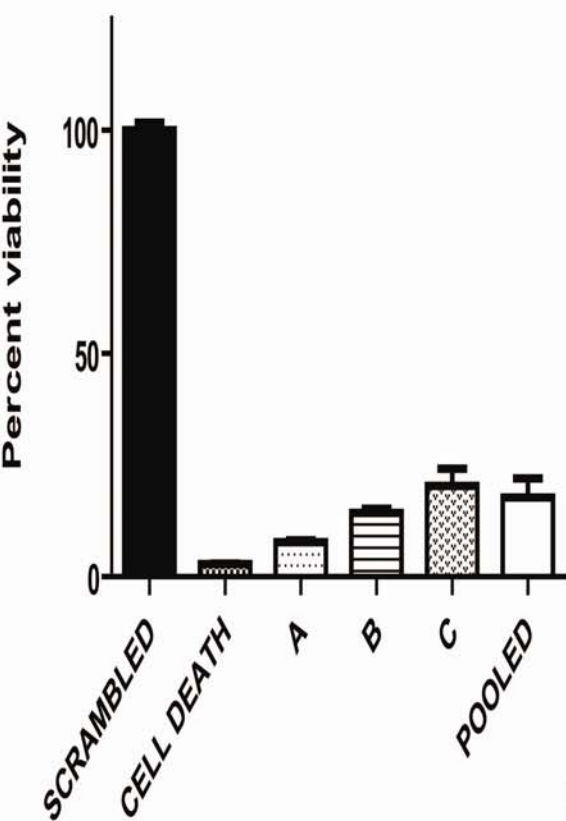

## PSMB4

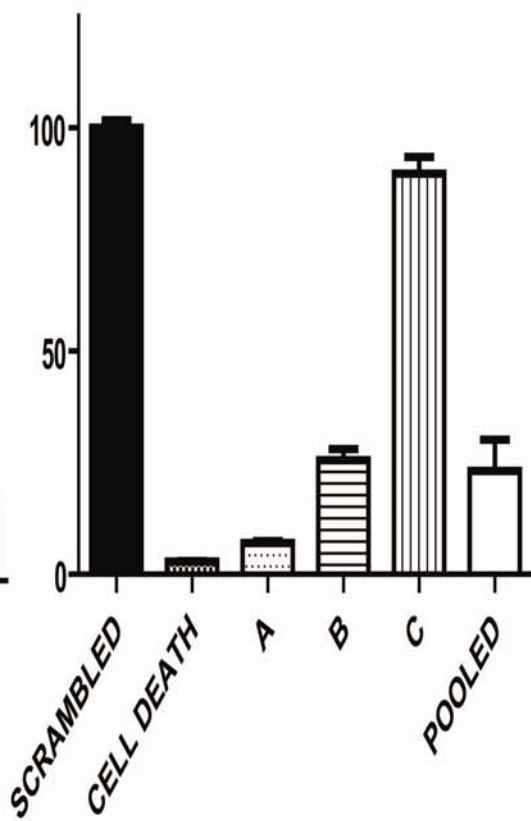

## PSMC6

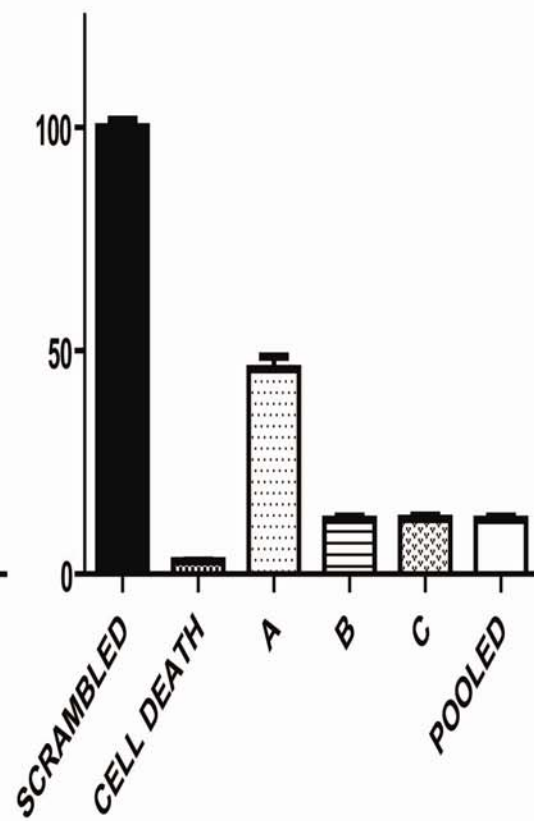

## PSMD14

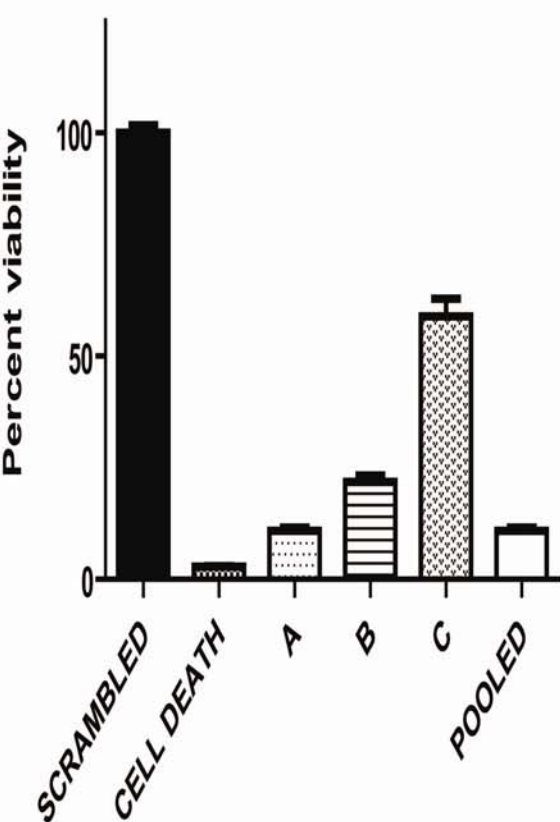

## RAN

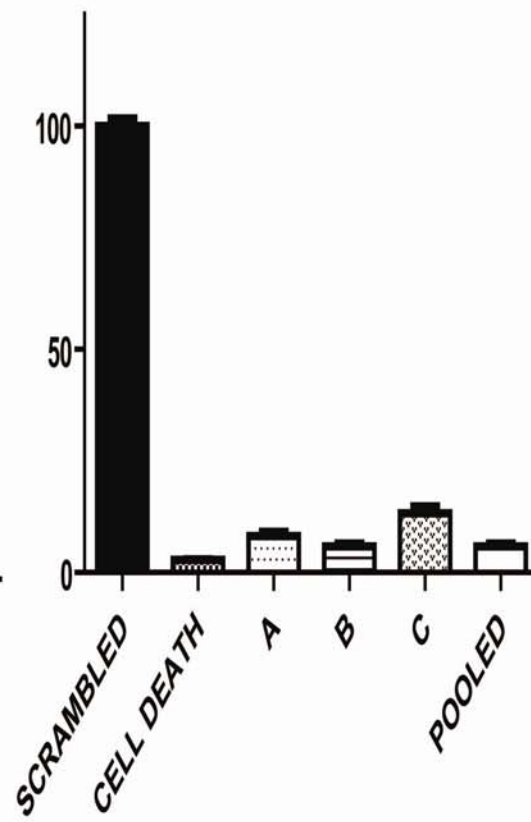

## DDX39

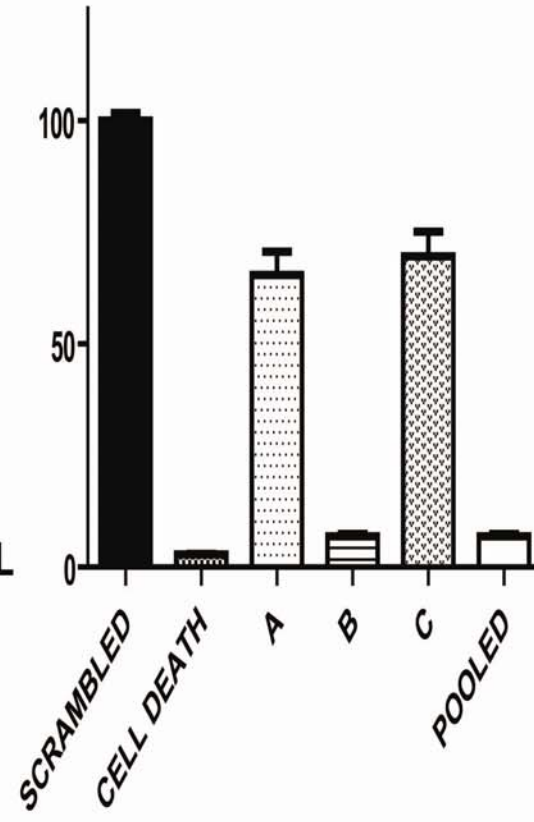

Supplement: SupplementrayFig1.pdf [file SupplementrayFig1.pdf]
